# Supplementary material for: Treatment Reality of Proximal Humeral Fractures in the Elderly—Trending Variants of Locking Plate Fixation in Germany
Source: MDPI journal article supplement (doi:10.3390/jcm12041440), 2023-02-10
Supplement: s1 [file s1]

# Supplementary Materials

Table S1. Subgroup coding for different treatment options.

| Treatment Option                    | OPS-Code                                                                                                                     |
|-------------------------------------|------------------------------------------------------------------------------------------------------------------------------|
| LPF only                            | 5-794.21, 5-794.k1                                                                                                           |
| LPF + cerclage                      | 5-793.21, 5-794.11, 5-794.f1, 5-78a.11                                                                                       |
| LPF + additional screw(s)           | 5-793.11, 5-794.01, 5-78a.01, 5-786.0                                                                                        |
| LPF with double plating             | 5-793.31, 5-793.k1, 5-794.21, 5-794.k1                                                                                       |
| LPF + bone augmentation, autologous | if coded twice or with both codes for regular and locking pate<br>5-784.01, 5-784.11, 5-784.21, 5-784.31, 5-784.41, 5-784.51 |
| LPF + bone augmentation, allogenic  | 5-784.61, 5-784.71, 5-784.81                                                                                                 |
| LPF + cement augmentation           | 5-785.01, 5-785.11, 5-86.a3                                                                                                  |

Table S2. Treatments per year by groups.

| Treatments per Year | LPF Only   | LPF + Fracture Fixation | LPF + Cerclage | LPF + Additional Screw(s) | LPF with Double Plating | LPF + Augmentation | LPF + Bone Augmentation, Autologous | LPF + Bone Augmentation, Allogenic | LPF + Cement Augmentation | Combination (Non-Disjoint) | Total |
|---------------------|------------|-------------------------|----------------|---------------------------|-------------------------|--------------------|-------------------------------------|------------------------------------|---------------------------|----------------------------|-------|
| 2010                | 4847 (88%) | 446 (8%)                | 335 (6%)       | 80 (1%)                   | 31 (1%)                 | 164 (3%)           | 11 (0%)                             | 74 (1%)                            | 79 (1%)                   | 30 (1%)                    | 5487  |
| 2011                | 4408 (86%) | 489 (10%)               | 350 (7%)       | 114 (2%)                  | 25 (0%)                 | 172 (3%)           | 8 (0%)                              | 66 (1%)                            | 98 (2%)                   | 41 (1%)                    | 5110  |
| 2012                | 3978 (84%) | 524 (11%)               | 388 (8%)       | 124 (3%)                  | 12 (0%)                 | 198 (4%)           | 8 (0%)                              | 87 (2%)                            | 103 (2%)                  | 40 (1%)                    | 4740  |
| 2013                | 3864 (82%) | 551 (12%)               | 434 (9%)       | 112 (2%)                  | 5 (0%)                  | 206 (4%)           | 8 (0%)                              | 77 (2%)                            | 121 (3%)                  | 68 (1%)                    | 4689  |
| 2014                | 3546 (79%) | 590 (13%)               | 471 (11%)      | 106 (2%)                  | 13 (0%)                 | 259 (6%)           | 8 (0%)                              | 82 (2%)                            | 169 (4%)                  | 83 (2%)                    | 4478  |
| 2015                | 3435 (76%) | 703 (16%)               | 575 (13%)      | 115 (3%)                  | 13 (0%)                 | 277 (6%)           | 10 (0%)                             | 102 (2%)                           | 165 (4%)                  | 101 (2%)                   | 4516  |
| 2016                | 3338 (74%) | 799 (18%)               | 664 (15%)      | 122 (3%)                  | 13 (0%)                 | 280 (6%)           | 10 (0%)                             | 94 (2%)                            | 176 (4%)                  | 106 (2%)                   | 4523  |
| 2017                | 3196 (72%) | 846 (19%)               | 717 (16%)      | 107 (2%)                  | 22 (0%)                 | 247 (6%)           | 9 (0%)                              | 102 (2%)                           | 136 (3%)                  | 142 (3%)                   | 4431  |
| 2018 (Q1–Q3)        | 2340 (72%) | 624 (19%)               | 531 (16%)      | 83 (3%)                   | 10 (0%)                 | 180 (6%)           | 4 (0%)                              | 80 (2%)                            | 96 (3%)                   | 98 (3%)                    | 3242  |

Table S3. Description of the cohort and values at baseline (detailed).

|                                          | LPF Only     | LPF + Fracture Fixation | LPF + Cerclage | LPF + Additional Screw(s) | LPF with Double Plating | LPF + Augmentation | LPF + Bone Augmentation, Autologous | LPF + Bone Augmentation, Allogenic | LPF + Cement Augmentation | Combination (Non-Disjoint) | Total        | p-Value |
|------------------------------------------|--------------|-------------------------|----------------|---------------------------|-------------------------|--------------------|-------------------------------------|------------------------------------|---------------------------|----------------------------|--------------|---------|
| Age (median, iqr)                        | 78 (±11)     | 78 (±11)                | 78 (±10)       | 77 (±10)                  | 79 (±11)                | 78 (±11)           | 76 (±12)                            | 78 (±10)                           | 79 (±10)                  | 77 (±11)                   | 78 (±11)     | <.0001  |
| Sex (women)                              | 27,698 (84%) | 4601 (83%)              | 3727 (83%)     | 750 (78%)                 | 124 (86%)               | 1646 (83%)         | 57 (75%)                            | 619 (81%)                          | 970 (85%)                 | 531 (75%)                  | 34,476 (84%) | <.0001  |
| Charlson comorbidity index (median, iqr) | 2 (±3)       | 2 (±3)                  | 2 (±3)         | 2 (±3)                    | 2 (±3)                  | 2 (±3)             | 2 (±3)                              | 3 (±3)                             | 2 (±3)                    | 2 (±3)                     | 2 (±3)       | 0.975   |
| Obesity                                  | 8815 (27%)   | 1512 (27%)              | 1199 (27%)     | 278 (29%)                 | 35 (24%)                | 551 (28%)          | 19 (25%)                            | 215 (28%)                          | 317 (28%)                 | 195 (28%)                  | 11,073 (27%) | 0.7775  |

|                                    |              |            |            |           |           |            |          |           |            |           |              |        |
|------------------------------------|--------------|------------|------------|-----------|-----------|------------|----------|-----------|------------|-----------|--------------|--------|
| Nicotine abuse                     | 1923 (6%)    | 408 (7%)   | 311 (7%)   | 85 (9%)   | 12 (8%)   | 119 (6%)   | 5 (7%)   | 38 (5%)   | 76 (7%)    | 50 (7%)   | 2500 (6%)    | 0.0003 |
| Alcohol abuse                      | 1785 (5%)    | 309 (6%)   | 245 (5%)   | 57 (6%)   | 7 (5%)    | 139 (7%)   | 8 (11%)  | 48 (6%)   | 83 (7%)    | 61 (9%)   | 2294 (6%)    | 0.0008 |
| Diabetes                           | 13,009 (39%) | 2117 (38%) | 1677 (38%) | 384 (40%) | 56 (39%)  | 791 (40%)  | 23 (30%) | 318 (42%) | 450 (39%)  | 274 (39%) | 16,191 (39%) | 0.1515 |
| Previous stroke                    | 8185 (25%)   | 1414 (25%) | 1132 (25%) | 251 (26%) | 31 (22%)  | 497 (25%)  | 19 (25%) | 193 (25%) | 285 (25%)  | 166 (23%) | 10,262 (25%) | 0.883  |
| Atrial fibrillation and flutter    | 6013 (18%)   | 996 (18%)  | 799 (18%)  | 166 (17%) | 31 (22%)  | 371 (19%)  | 15 (20%) | 146 (19%) | 210 (18%)  | 132 (19%) | 7512 (18%)   | 0.917  |
| Congestive heart failure           | 9790 (30%)   | 1543 (28%) | 1248 (28%) | 250 (26%) | 45 (31%)  | 557 (28%)  | 16 (21%) | 228 (30%) | 313 (27%)  | 180 (25%) | 12,070 (29%) | 0.0026 |
| Coronary heart disease             | 10,053 (31%) | 1625 (29%) | 1303 (29%) | 281 (29%) | 41 (28%)  | 595 (30%)  | 25 (33%) | 226 (30%) | 344 (30%)  | 198 (28%) | 12,471 (30%) | 0.4907 |
| Hypertension                       | 28,685 (87%) | 4797 (86%) | 3814 (85%) | 858 (89%) | 125 (87%) | 1736 (88%) | 61 (80%) | 673 (88%) | 1002 (88%) | 612 (86%) | 35,830 (87%) | 0.0119 |
| Atherosclerosis                    | 5335 (16%)   | 980 (18%)  | 806 (18%)  | 155 (16%) | 19 (13%)  | 381 (19%)  | 8 (11%)  | 158 (21%) | 215 (19%)  | 119 (17%) | 6815 (17%)   | 0.0003 |
| Chronic kidney disease             | 8653 (26%)   | 1451 (26%) | 1158 (26%) | 257 (27%) | 36 (25%)  | 566 (29%)  | 13 (17%) | 241 (32%) | 312 (27%)  | 187 (26%) | 10,857 (26%) | 0.0332 |
| Cancer                             | 7123 (22%)   | 1273 (23%) | 1034 (23%) | 215 (22%) | 24 (17%)  | 436 (22%)  | 15 (20%) | 167 (22%) | 254 (22%)  | 164 (23%) | 8996 (22%)   | 0.2609 |
| Dementia                           | 1768 (5%)    | 303 (5%)   | 244 (5%)   | 47 (5%)   | 12 (8%)   | 95 (5%)    | 2 (3%)   | 38 (5%)   | 55 (5%)    | 33 (5%)   | 2199 (5%)    | 0.5713 |
| Parkinson's                        | 1351 (4%)    | 208 (4%)   | 165 (4%)   | 37 (4%)   | 6 (4%)    | 83 (4%)    | 2 (3%)   | 36 (5%)   | 45 (4%)    | 26 (4%)   | 1668 (4%)    | 0.8529 |
| Seropositive chronic polyarthritis | 1983 (6%)    | 338 (6%)   | 270 (6%)   | 60 (6%)   | 8 (6%)    | 142 (7%)   | 4 (5%)   | 49 (6%)   | 89 (8%)    | 42 (6%)   | 2505 (6%)    | 0.4896 |
| Arthritis of the shoulder          | 670 (2%)     | 131 (2%)   | 110 (2%)   | 19 (2%)   | 2 (1%)    | 54 (3%)    | 2 (3%)   | 24 (3%)   | 28 (2%)    | 18 (3%)   | 873 (2%)     | 0.2286 |
| Frozen shoulder                    | 1492 (5%)    | 223 (4%)   | 177 (4%)   | 39 (4%)   | 7 (5%)    | 82 (4%)    | 4 (5%)   | 36 (5%)   | 42 (4%)    | 41 (6%)   | 1838 (4%)    | 0.3185 |
| Rotator cuff tear                  | 2012 (6%)    | 378 (7%)   | 302 (7%)   | 69 (7%)   | 7 (5%)    | 165 (8%)   | 9 (12%)  | 69 (9%)   | 87 (8%)    | 66 (9%)   | 2621 (6%)    | <.0001 |
| Injury of axillary artery          | 16 (0%)      | 5 (0%)     | 4 (0%)     | 0 (0%)    | 1 (1%)    | 3 (0%)     | 0 (0%)   | 1 (0%)    | 2 (0%)     | 1 (0%)    | 25 (0%)      | 0.0309 |
| Brachial plexus injury             | 116 (0%)     | 13 (0%)    | 11 (0%)    | 2 (0%)    | 0 (0%)    | 13 (1%)    | 0 (0%)   | 4 (1%)    | 9 (1%)     | 9 (1%)    | 151 (0%)     | 0.0007 |
| Previous shoulder surgery          | 74 (0%)      | 14 (0%)    | 10 (0%)    | 4 (0%)    | 0 (0%)    | 9 (0%)     | 1 (1%)   | 4 (1%)    | 4 (0%)     | 2 (0%)    | 99 (0%)      | 0.2658 |
| Osteoporosis                       | 11,448 (35%) | 1948 (35%) | 1590 (36%) | 307 (32%) | 51 (35%)  | 824 (42%)  | 40 (53%) | 301 (39%) | 483 (42%)  | 246 (35%) | 14,466 (35%) | <.0001 |
| Osteoporosis treatment             | 3243 (10%)   | 561 (10%)  | 462 (10%)  | 87 (9%)   | 12 (8%)   | 225 (11%)  | 13 (17%) | 84 (11%)  | 128 (11%)  | 67 (9%)   | 4096 (10%)   | 0.188  |

Absolute number (n=), standard deviation (SD), percent (%). Note that discrepancies between fine granular level and aggregated categories arise from different amounts of non-disjoint groups for each level.

**Table S4.** Outcomes and complications (detailed).

|                                               | LPF Only   | LPF + Fracture Fixation | LPF + Cerclage | LPF + Additional Screw(s) | LPF with Double Plating | LPF + Augmentation | LPF + Bone Augmentation, Autologous | LPF + Bone Augmentation, Allogenic | LPF + Cement Augmentation | Combination (Non-Disjoint) | Total      | p-Value |
|-----------------------------------------------|------------|-------------------------|----------------|---------------------------|-------------------------|--------------------|-------------------------------------|------------------------------------|---------------------------|----------------------------|------------|---------|
| Overall intrahospital complication rate       | 4915 (15%) | 806 (14%)               | 633 (14%)      | 150 (16%)                 | 23 (16%)                | 374 (19%)          | 17 (22%)                            | 148 (19%)                          | 209 (18%)                 | 116 (16%)                  | 6211 (15%) | 0.0002  |
| Consequence of injury                         | 47 (0%)    | 9 (0%)                  | 6 (0%)         | 2 (0%)                    | 1 (1%)                  | 6 (0%)             | 1 (1%)                              | 3 (0%)                             | 2 (0%)                    | 1 (0%)                     | 63 (0%)    | 0.0736  |
| Implant malposition                           | 39 (0%)    | 8 (0%)                  | 7 (0%)         | 0 (0%)                    | 1 (1%)                  | 5 (0%)             | 0 (0%)                              | 3 (0%)                             | 2 (0%)                    | 4 (1%)                     | 56 (0%)    | 0.0081  |
| Mechanical complication (dysfunction/failure) | 43 (0%)    | 9 (0%)                  | 8 (0%)         | 0 (0%)                    | 1 (1%)                  | 6 (0%)             | 0 (0%)                              | 3 (0%)                             | 3 (0%)                    | 4 (1%)                     | 62 (0%)    | 0.0142  |
| Mechanical complication (loosening)           | 39 (0%)    | 8 (0%)                  | 7 (0%)         | 0 (0%)                    | 1 (1%)                  | 5 (0%)             | 0 (0%)                              | 3 (0%)                             | 2 (0%)                    | 4 (1%)                     | 56 (0%)    | 0.0081  |
| Periprosthetic fractures                      | 46 (0%)    | 12 (0%)                 | 9 (0%)         | 3 (0%)                    | 0 (0%)                  | 6 (0%)             | 0 (0%)                              | 3 (0%)                             | 3 (0%)                    | 3 (0%)                     | 67 (0%)    | 0.2301  |
| Peri-implant fracture                         | 77 (0%)    | 18 (0%)                 | 14 (0%)        | 3 (0%)                    | 1 (1%)                  | 11 (1%)            | 0 (0%)                              | 6 (1%)                             | 5 (0%)                    | 6 (1%)                     | 112 (0%)   | 0.0046  |
| Luxation                                      | 1011 (3%)  | 247 (4%)                | 197 (4%)       | 47 (5%)                   | 3 (2%)                  | 91 (5%)            | 2 (3%)                              | 41 (5%)                            | 48 (4%)                   | 44 (6%)                    | 1393 (3%)  | <.0001  |
| Necrosis                                      | 72 (0%)    | 10 (0%)                 | 8 (0%)         | 2 (0%)                    | 0 (0%)                  | 9 (0%)             | 0 (0%)                              | 4 (1%)                             | 5 (0%)                    | 0 (0%)                     | 91 (0%)    | 0.3294  |
| Nerve injury                                  | 74 (0%)    | 8 (0%)                  | 5 (0%)         | 2 (0%)                    | 1 (1%)                  | 12 (1%)            | 0 (0%)                              | 4 (1%)                             | 8 (1%)                    | 4 (1%)                     | 98 (0%)    | 0.0041  |
| Vascular injury                               | 20 (0%)    | 5 (0%)                  | 4 (0%)         | 0 (0%)                    | 1 (1%)                  | 5 (0%)             | 0 (0%)                              | 2 (0%)                             | 3 (0%)                    | 1 (0%)                     | 31 (0%)    | 0.0101  |
| Haematoma                                     | 715 (2%)   | 102 (2%)                | 83 (2%)        | 16 (2%)                   | 3 (2%)                  | 57 (3%)            | 3 (4%)                              | 18 (2%)                            | 36 (3%)                   | 18 (3%)                    | 892 (2%)   | 0.1824  |
| Compartment syndrome                          | 199 (1%)   | 51 (1%)                 | 36 (1%)        | 14 (1%)                   | 1 (1%)                  | 16 (1%)            | 0 (0%)                              | 4 (1%)                             | 12 (1%)                   | 7 (1%)                     | 273 (1%)   | 0.019   |
| Impingement                                   | 67 (0%)    | 3 (0%)                  | 2 (0%)         | 1 (0%)                    | 0 (0%)                  | 6 (0%)             | 2 (3%)                              | 1 (0%)                             | 3 (0%)                    | 1 (0%)                     | 77 (0%)    | <.0001  |
| Bursitis                                      | 27 (0%)    | 9 (0%)                  | 8 (0%)         | 0 (0%)                    | 1 (1%)                  | 1 (0%)             | 1 (1%)                              | 0 (0%)                             | 0 (0%)                    | 1 (0%)                     | 38 (0%)    | 0.0008  |
| Infection                                     | 171 (1%)   | 39 (1%)                 | 34 (1%)        | 4 (0%)                    | 1 (1%)                  | 16 (1%)            | 2 (3%)                              | 5 (1%)                             | 9 (1%)                    | 5 (1%)                     | 231 (1%)   | 0.1019  |
| Infection with antibiotic resistance          | 34 (0%)    | 2 (0%)                  | 1 (0%)         | 0 (0%)                    | 1 (1%)                  | 3 (0%)             | 1 (1%)                              | 1 (0%)                             | 1 (0%)                    | 2 (0%)                     | 41 (0%)    | 0.002   |
| Sepsis                                        | 156 (0%)   | 19 (0%)                 | 11 (0%)        | 7 (1%)                    | 1 (1%)                  | 15 (1%)            | 1 (1%)                              | 7 (1%)                             | 7 (1%)                    | 6 (1%)                     | 196 (0%)   | 0.0681  |
| Non-mechanical surgical complication          | 855 (3%)   | 136 (2%)                | 114 (3%)       | 19 (2%)                   | 3 (2%)                  | 69 (3%)            | 5 (7%)                              | 21 (3%)                            | 43 (4%)                   | 22 (3%)                    | 1082 (3%)  | 0.0701  |
| Mechanical surgical complication              | 174 (1%)   | 32 (1%)                 | 26 (1%)        | 4 (0%)                    | 2 (1%)                  | 19 (1%)            | 3 (4%)                              | 7 (1%)                             | 9 (1%)                    | 8 (1%)                     | 233 (1%)   | 0.0007  |
| Surgical incident                             | 130 (0%)   | 23 (0%)                 | 14 (0%)        | 6 (1%)                    | 3 (2%)                  | 18 (1%)            | 0 (0%)                              | 6 (1%)                             | 12 (1%)                   | 4 (1%)                     | 175 (0%)   | 0.0005  |
| Re-operation                                  | 2516 (8%)  | 408 (7%)                | 318 (7%)       | 76 (8%)                   | 14 (10%)                | 213 (11%)          | 11 (14%)                            | 78 (10%)                           | 124 (11%)                 | 65 (9%)                    | 3202 (8%)  | <.0001  |
| Additional surgery                            | 1457 (4%)  | 222 (4%)                | 177 (4%)       | 39 (4%)                   | 6 (4%)                  | 111 (6%)           | 3 (4%)                              | 46 (6%)                            | 62 (5%)                   | 38 (5%)                    | 1828 (4%)  | 0.1238  |

|                             |               |           |           |           |          |           |          |           |           |           |               |        |
|-----------------------------|---------------|-----------|-----------|-----------|----------|-----------|----------|-----------|-----------|-----------|---------------|--------|
| Blood transfusion           | 4877<br>(15%) | 812 (15%) | 631 (14%) | 154 (16%) | 27 (19%) | 379 (19%) | 18 (24%) | 142 (19%) | 219 (19%) | 121 (17%) | 6189<br>(15%) | <.0001 |
| Thromboembolism             | 316<br>(1%)   | 52 (1%)   | 40 (1%)   | 11 (1%)   | 1 (1%)   | 22 (1%)   | 2 (3%)   | 11 (1%)   | 9 (1%)    | 12 (2%)   | 402<br>(1%)   | 0.2645 |
| Deep vein thrombosis        | 56 (0%)       | 13 (0%)   | 10 (0%)   | 3 (0%)    | 0 (0%)   | 1 (0%)    | 0 (0%)   | 0 (0%)    | 1 (0%)    | 2 (0%)    | 72 (0%)       | 0.7342 |
| Pulmonary embolism          | 84 (0%)       | 18 (0%)   | 11 (0%)   | 6 (1%)    | 1 (1%)   | 8 (0%)    | 1 (1%)   | 4 (1%)    | 3 (0%)    | 2 (0%)    | 112<br>(0%)   | 0.1553 |
| Ards                        | 7 (0%)        | 4 (0%)    | 3 (0%)    | 1 (0%)    | 0 (0%)   | 1 (0%)    | 0 (0%)   | 0 (0%)    | 1 (0%)    | 1 (0%)    | 13 (0%)       | 0.2791 |
| Stroke                      | 235<br>(1%)   | 39 (1%)   | 34 (1%)   | 5 (1%)    | 0 (0%)   | 16 (1%)   | 2 (3%)   | 7 (1%)    | 7 (1%)    | 8 (1%)    | 298<br>(1%)   | 0.3492 |
| Acute myocardial infarction | 209<br>(1%)   | 28 (1%)   | 26 (1%)   | 2 (0%)    | 0 (0%)   | 12 (1%)   | 0 (0%)   | 6 (1%)    | 6 (1%)    | 1 (0%)    | 250<br>(1%)   | 0.3858 |
| Acute renal failure         | 558<br>(2%)   | 119 (2%)  | 98 (2%)   | 19 (2%)   | 2 (1%)   | 49 (2%)   | 3 (4%)   | 19 (2%)   | 27 (2%)   | 17 (2%)   | 743<br>(2%)   | 0.0542 |
| Acute liver failure         | 35 (0%)       | 9 (0%)    | 8 (0%)    | 0 (0%)    | 1 (1%)   | 2 (0%)    | 0 (0%)   | 2 (0%)    | 0 (0%)    | 1 (0%)    | 47 (0%)       | 0.183  |
| Multiple organ failure      | 0 (0%)        | 0 (0%)    | 0 (0%)    | 0 (0%)    | 0 (0%)   | 0 (0%)    | 0 (0%)   | 0 (0%)    | 0 (0%)    | 0 (0%)    | 0 (0%)        | ./.    |
| Delirium                    | 1317<br>(4%)  | 211 (4%)  | 170 (4%)  | 36 (4%)   | 5 (3%)   | 88 (4%)   | 3 (4%)   | 41 (5%)   | 44 (4%)   | 27 (4%)   | 1643<br>(4%)  | 0.7142 |
| Reanimation                 | 135<br>(0%)   | 21 (0%)   | 18 (0%)   | 2 (0%)    | 1 (1%)   | 8 (0%)    | 0 (0%)   | 6 (1%)    | 2 (0%)    | 2 (0%)    | 166<br>(0%)   | 0.5294 |
| Intensive care treatment    | 899<br>(3%)   | 120 (2%)  | 86 (2%)   | 32 (3%)   | 2 (1%)   | 57 (3%)   | 4 (5%)   | 22 (3%)   | 31 (3%)   | 22 (3%)   | 1098<br>(3%)  | 0.0351 |
| General complication        | 2924<br>(9%)  | 475 (9%)  | 375 (8%)  | 90 (9%)   | 10 (7%)  | 203 (10%) | 8 (11%)  | 90 (12%)  | 105 (9%)  | 66 (9%)   | 3668<br>(9%)  | 0.1544 |
| Major adverse event         | 1388<br>(4%)  | 247 (4%)  | 202 (5%)  | 41 (4%)   | 4 (3%)   | 108 (5%)  | 5 (7%)   | 49 (6%)   | 54 (5%)   | 32 (5%)   | 1775<br>(4%)  | 0.1078 |
| Intra-hospital death        | 544<br>(2%)   | 83 (1%)   | 63 (1%)   | 17 (2%)   | 3 (2%)   | 41 (2%)   | 0 (0%)   | 24 (3%)   | 17 (1%)   | 7 (1%)    | 675<br>(2%)   | 0.0275 |
| 30-day mortality            | 734<br>(2%)   | 115 (2%)  | 92 (2%)   | 20 (2%)   | 3 (2%)   | 51 (3%)   | 2 (3%)   | 25 (3%)   | 24 (2%)   | 8 (1%)    | 908<br>(2%)   | 0.2851 |

**Table S5.** Length of hospital stay and treatment costs (detailed).

|                                    | LPF Only              | LPF + Fracture Fixation | LPF +<br>Cerclage     | LPF + Additional Screw(s) | LPF with Double Plating | LPF + Augmentation    | LPF + Bone<br>Augmentation,<br>Autologous | LPF + Bone<br>Augmentation,<br>Allogenic | LPF + Cement<br>Augmentation | Combina-<br>tion (Non-<br>Disjoint) |
|------------------------------------|-----------------------|-------------------------|-----------------------|---------------------------|-------------------------|-----------------------|-------------------------------------------|------------------------------------------|------------------------------|-------------------------------------|
| Length of stay (in days; mean, SD) | 14.6<br>(±11.4)       | 14.4<br>(±11.2)         | 14.2<br>(±10.9)       | 14.6<br>(±10.7)           | 17.4<br>(±15.1)         | 15.9<br>(±12.2)       | 15.1<br>(±11.1)                           | 16.2<br>(±12.7)                          | 15.6<br>(±11.7)              | 15.1<br>(±12.0)                     |
| Cost (in Euro; mean, SD)           | 6748.76<br>(±5626.63) | 7987.40<br>(±4926.42)   | 7981.70<br>(±4963.54) | 7770.88<br>(±4311.32)     | 8843.29<br>(±5196.16)   | 8491.79<br>(±5087.06) | 8531.74<br>(±2892.88)                     | 8822.72<br>(±5372.02)                    | 8247.19<br>(±5006.28)        | 8673.78<br>(±5097.10)               |
